# Supplementary material for: Metapangenomics of the oral microbiome provides insights into habitat adaptation and cultivar diversity
Source: bioRxiv or medRxiv preprint supplement (doi:10.1101/2020.05.01.072496), 2020-07-31
Supplement: Supplementary file [file media-2.pdf]

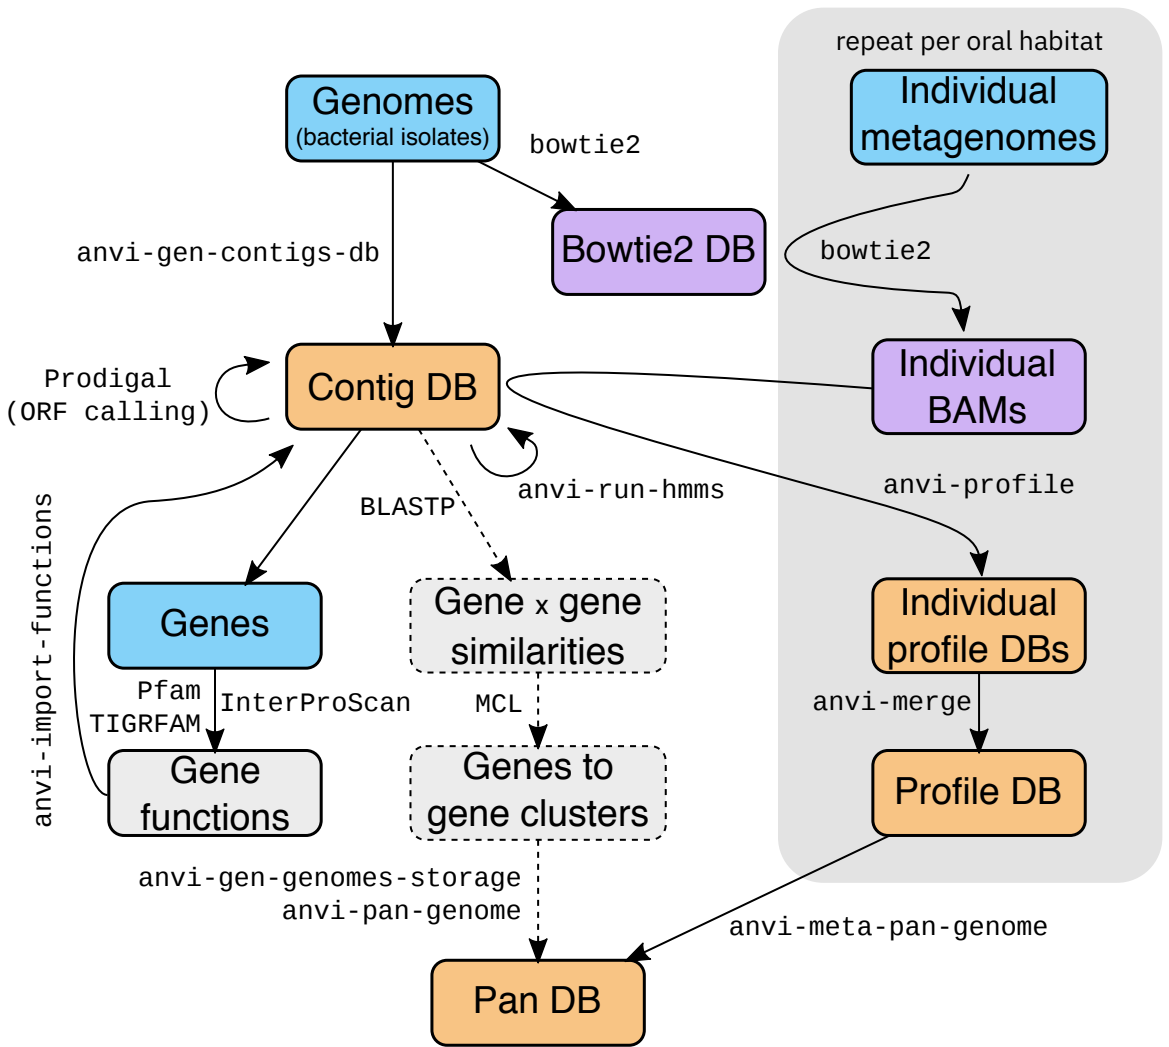

## Key to filetypes:

FASTA  
(sequence)

Anvi'o DB

Mapping files  
(bowtie2)

Table
