# Supplementary material for: Metapangenomics of the oral microbiome provides insights into habitat adaptation and cultivar diversity
Source: bioRxiv or medRxiv preprint supplement (doi:10.1101/2020.05.01.072496), 2020-07-31

**A**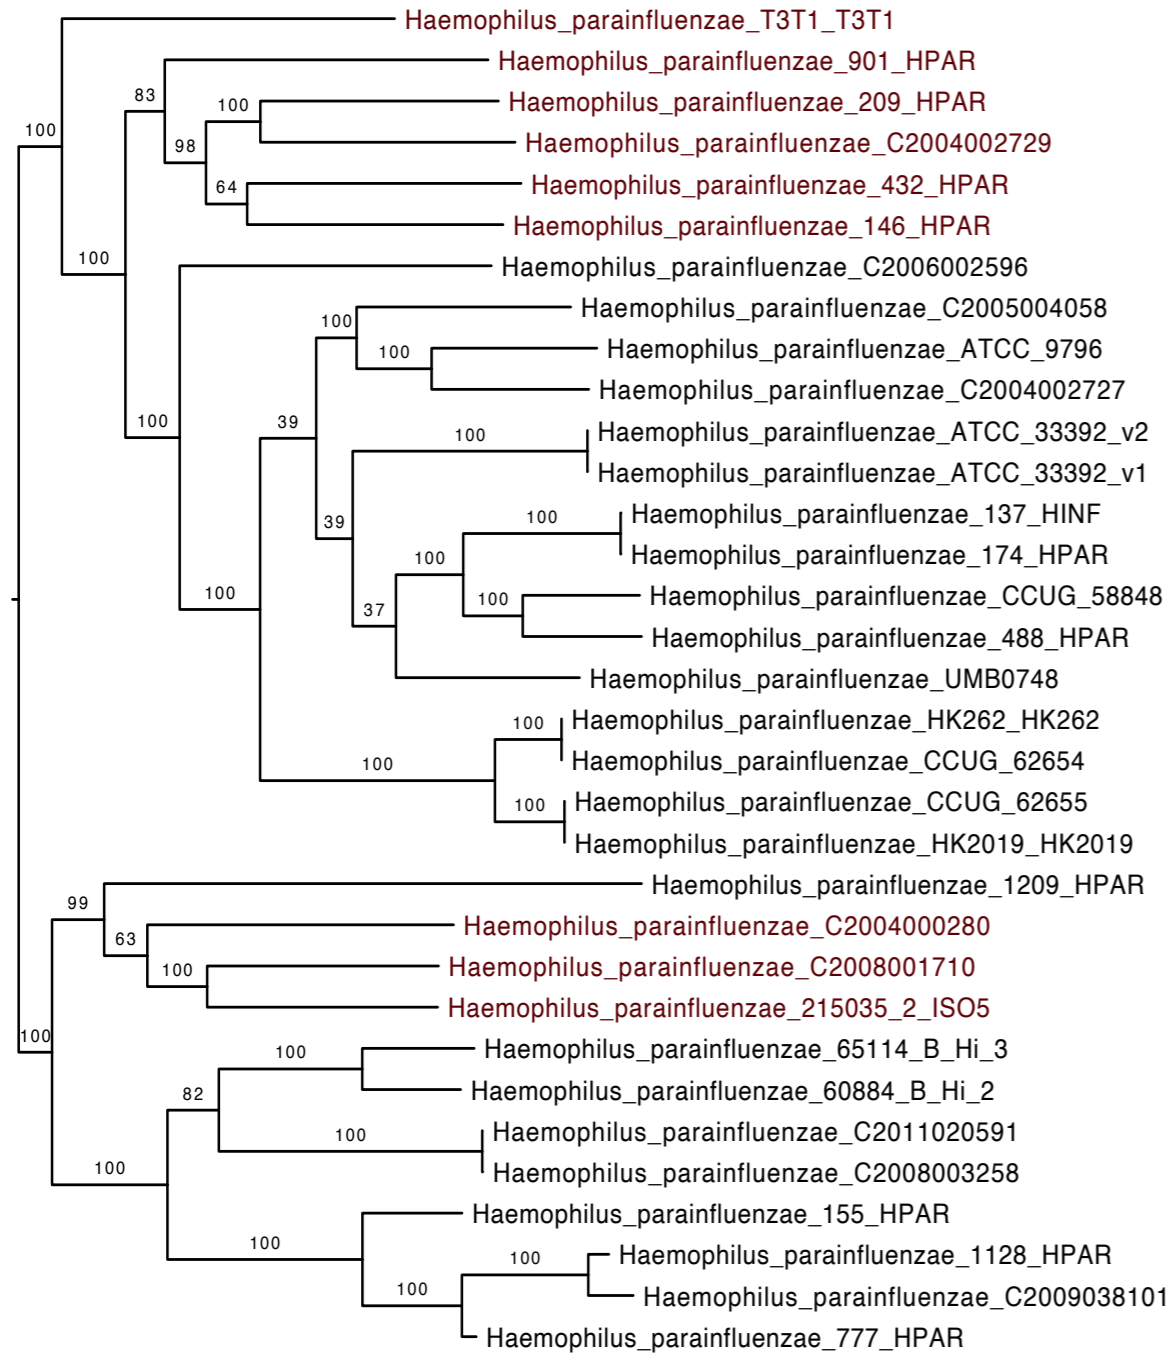

0.02

**B**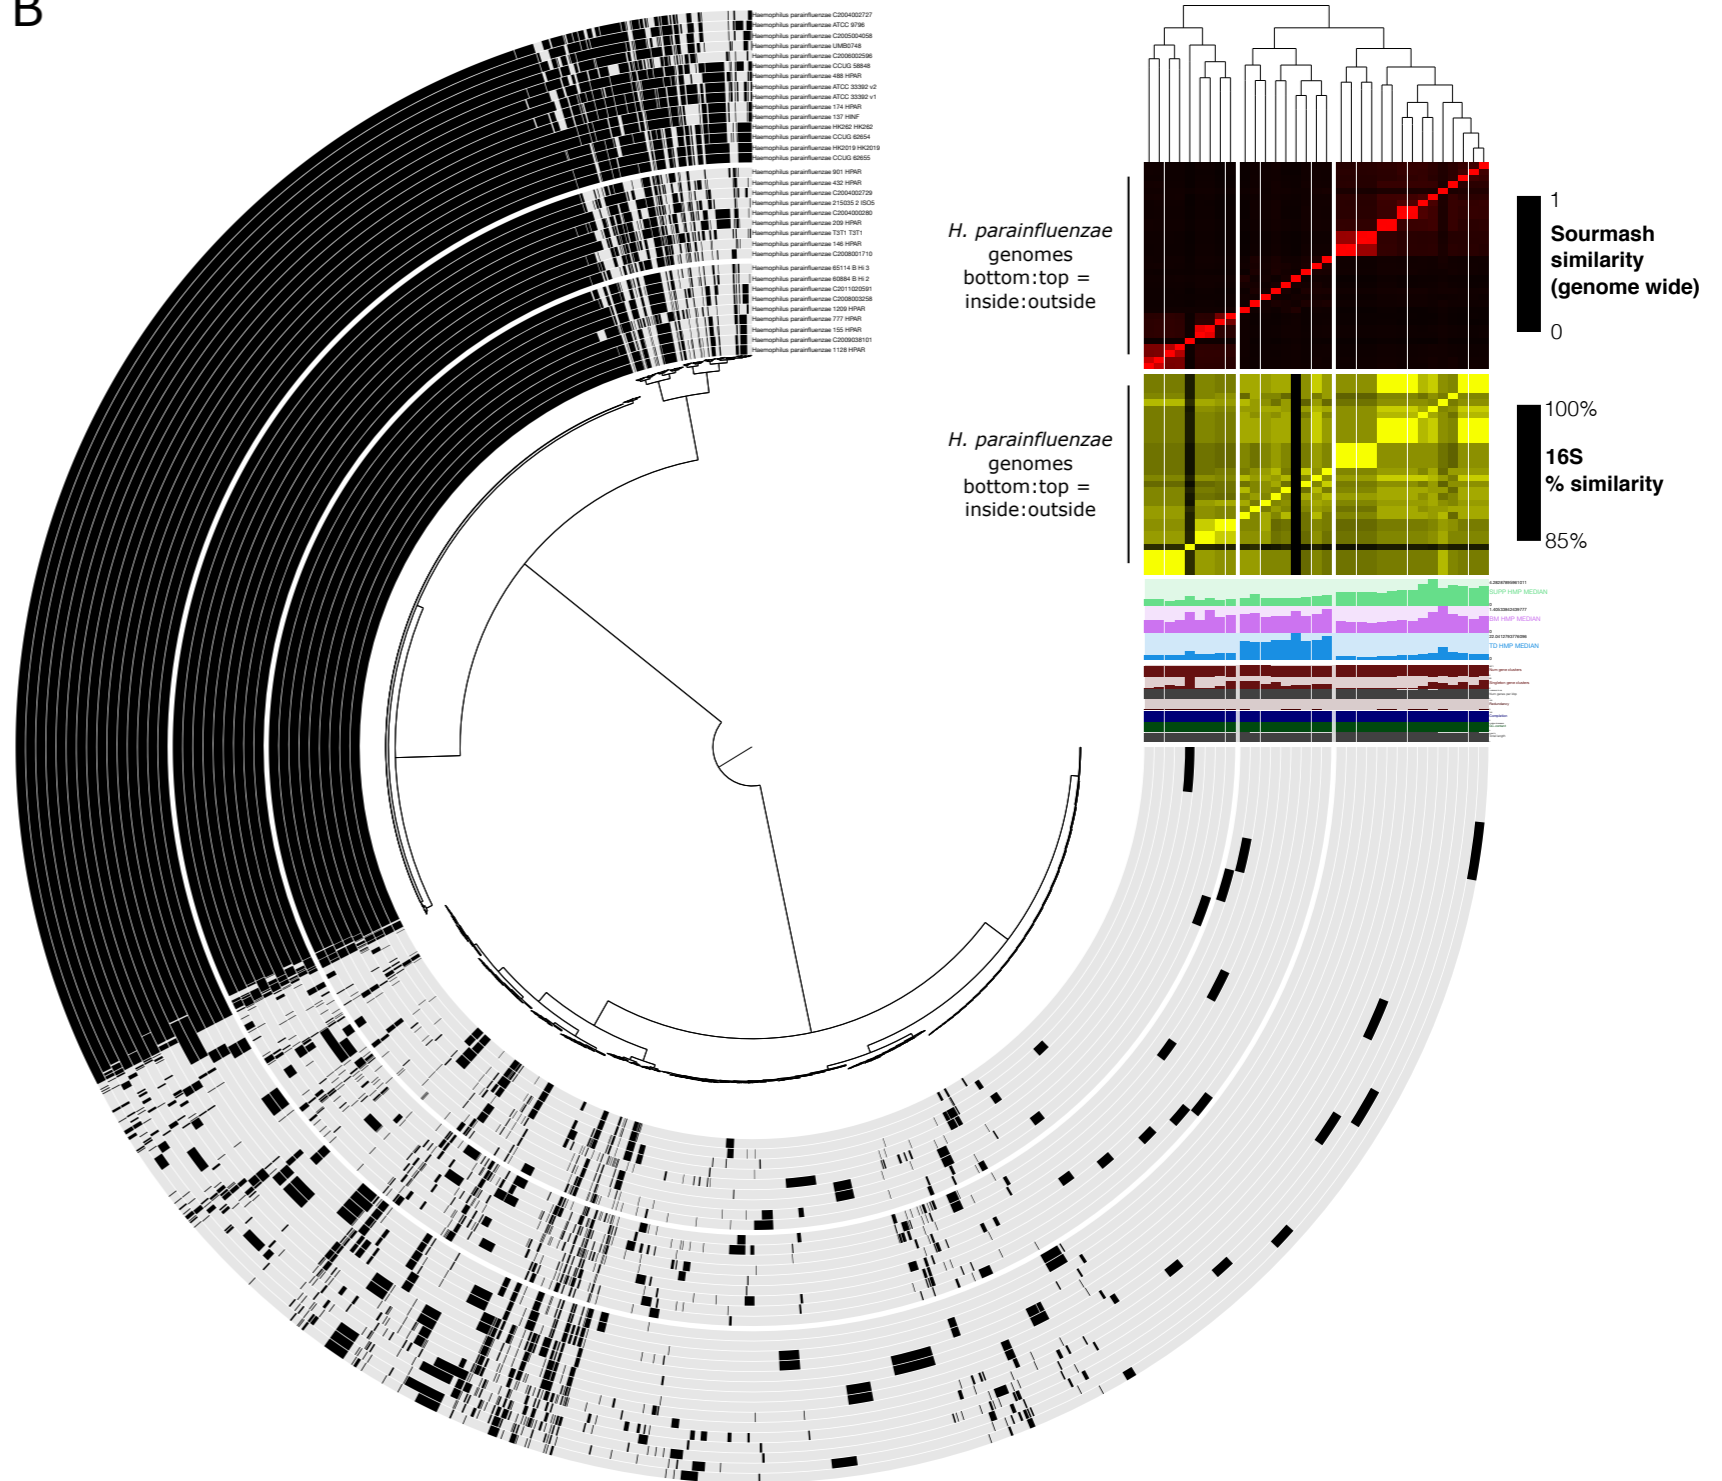

Supplement: Supplementary file [file media-6.pdf]
