# Supplementary material for: Metapangenomics of the oral microbiome provides insights into habitat adaptation and cultivar diversity
Source: bioRxiv or medRxiv preprint supplement (doi:10.1101/2020.05.01.072496), 2020-07-31

Coverage  
(average number of reads per nt)

Detection  
(fraction of each gene covered at all)

SUPP

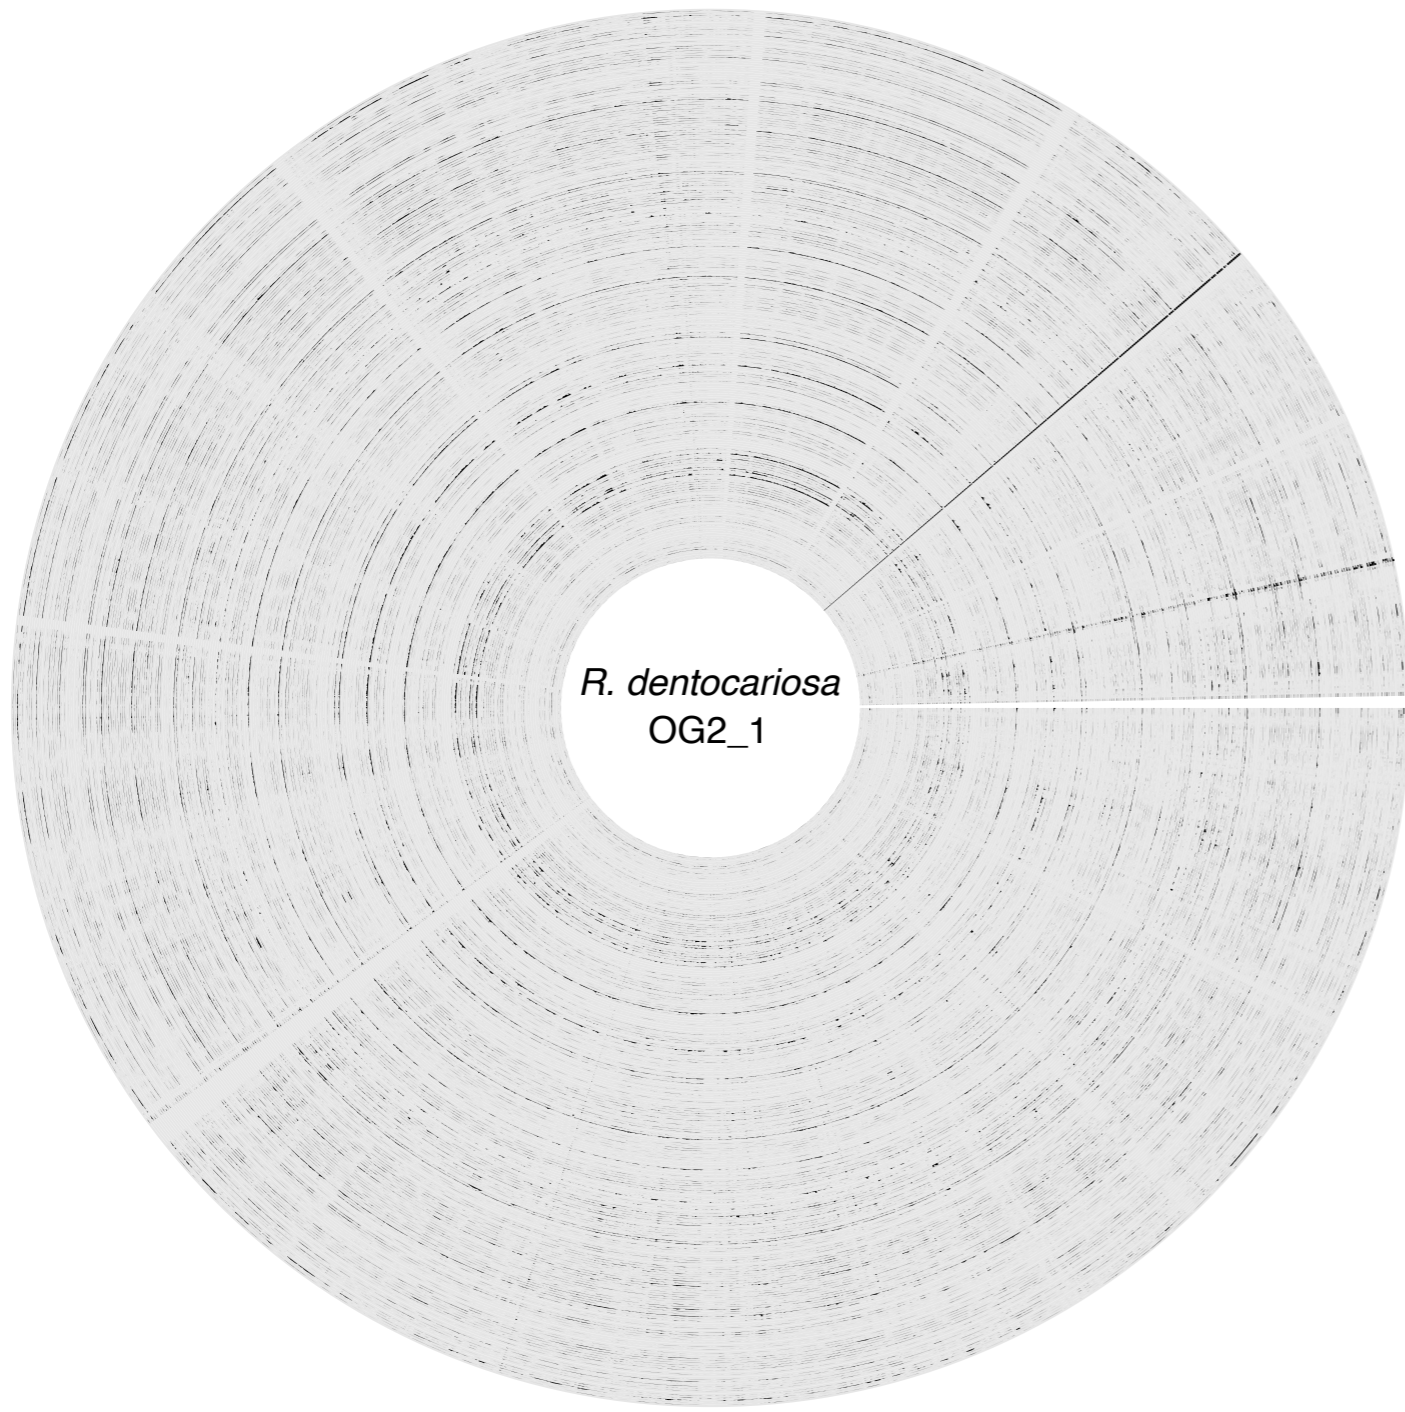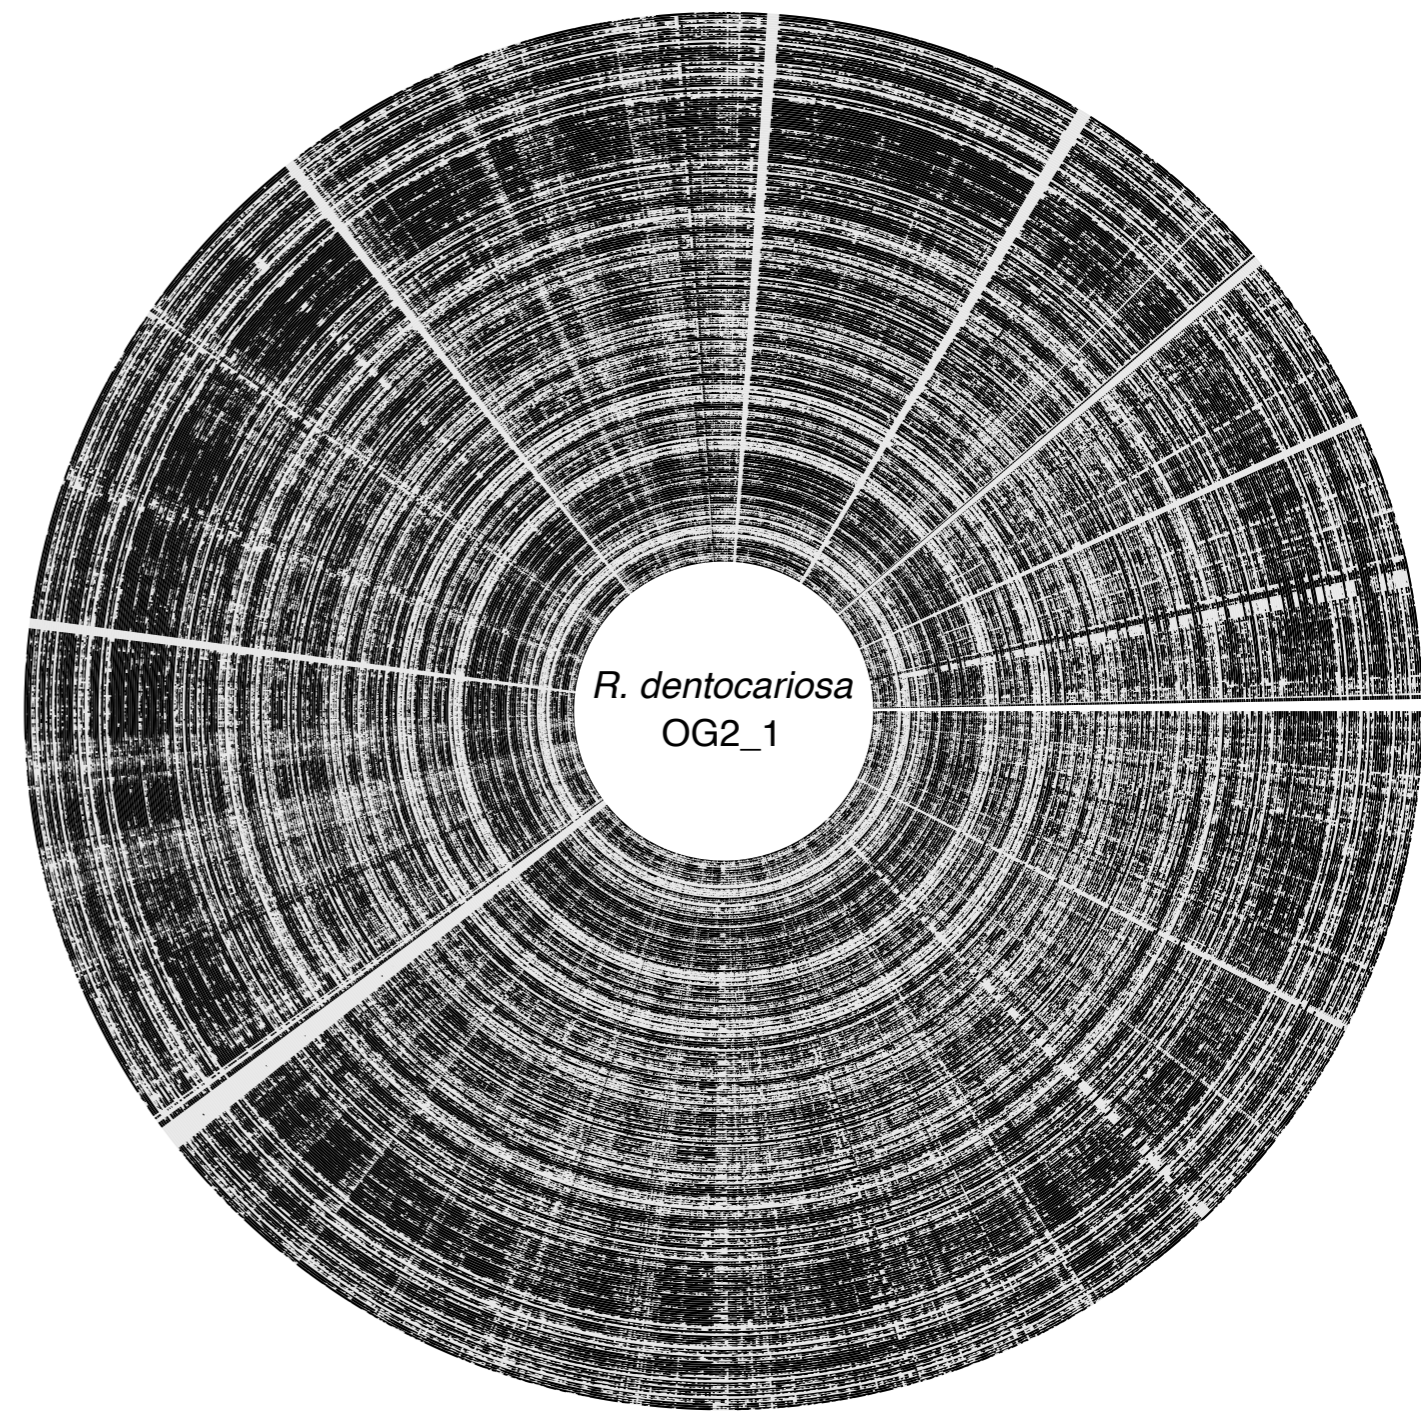

BM

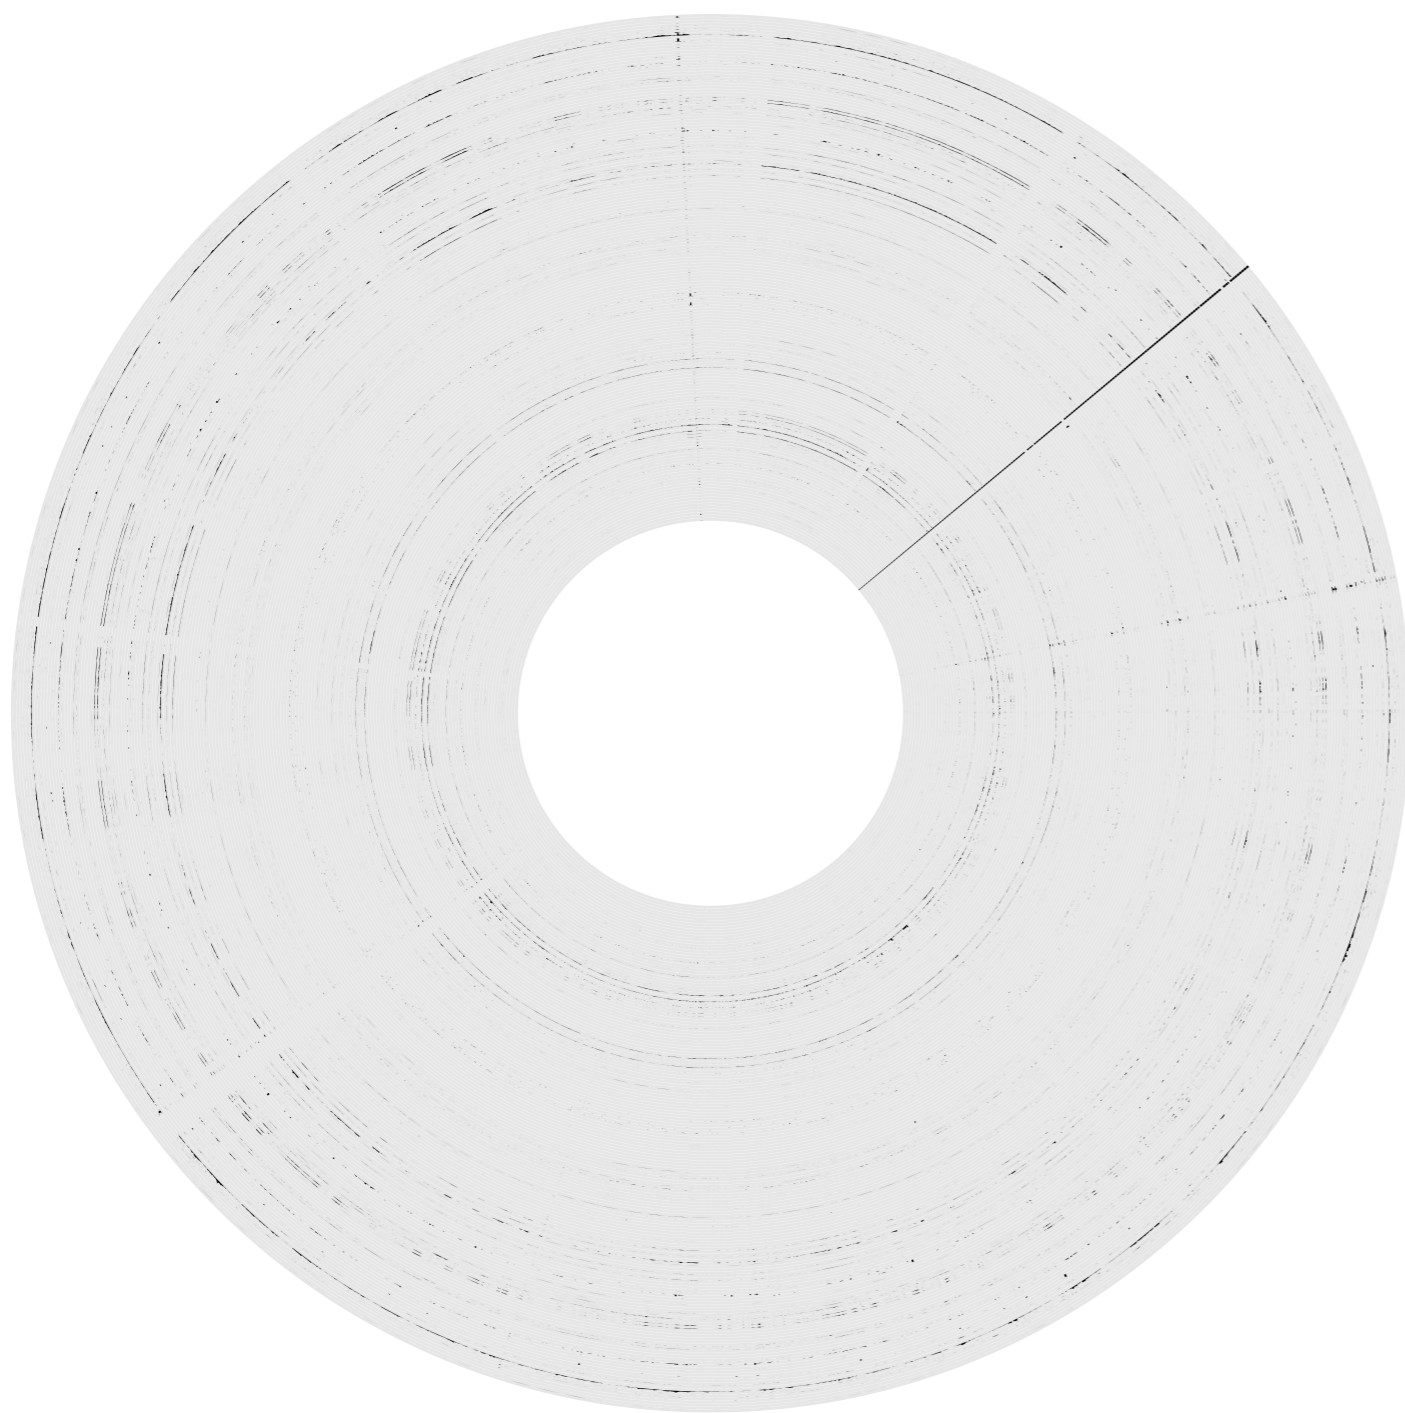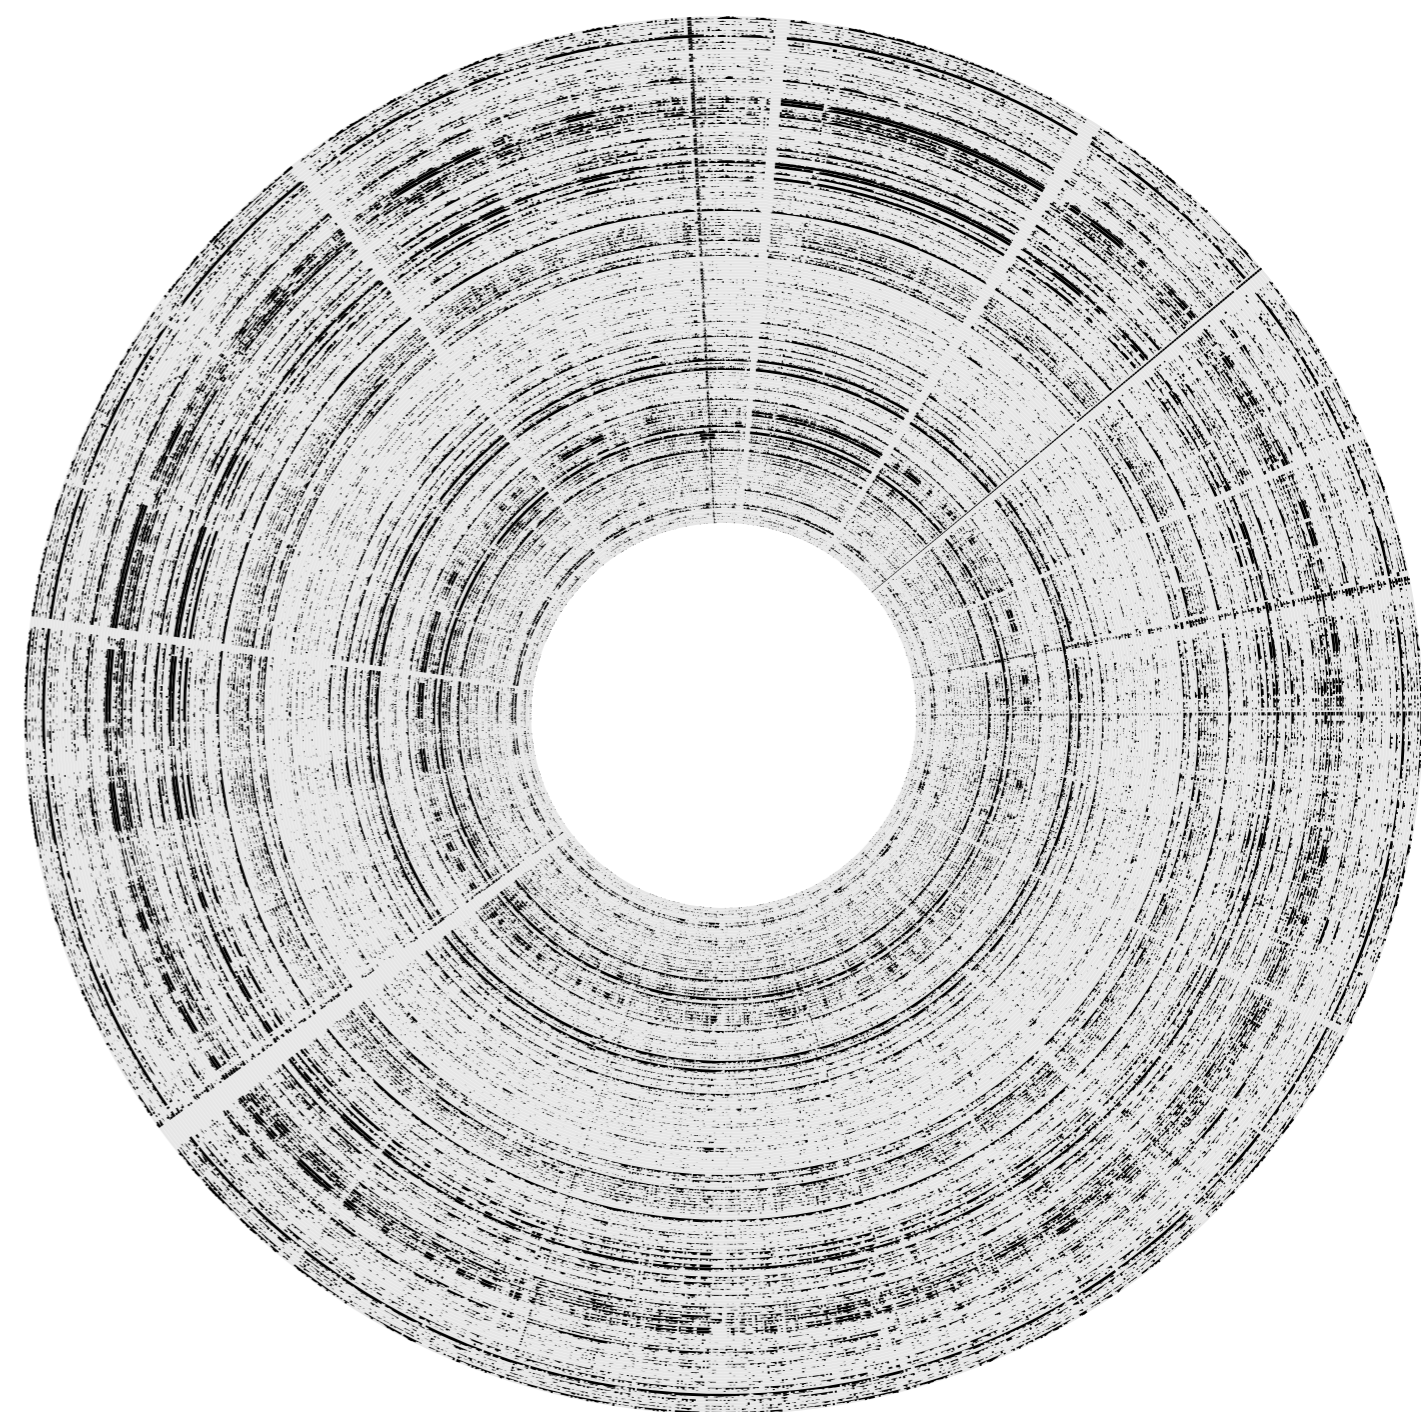

TD

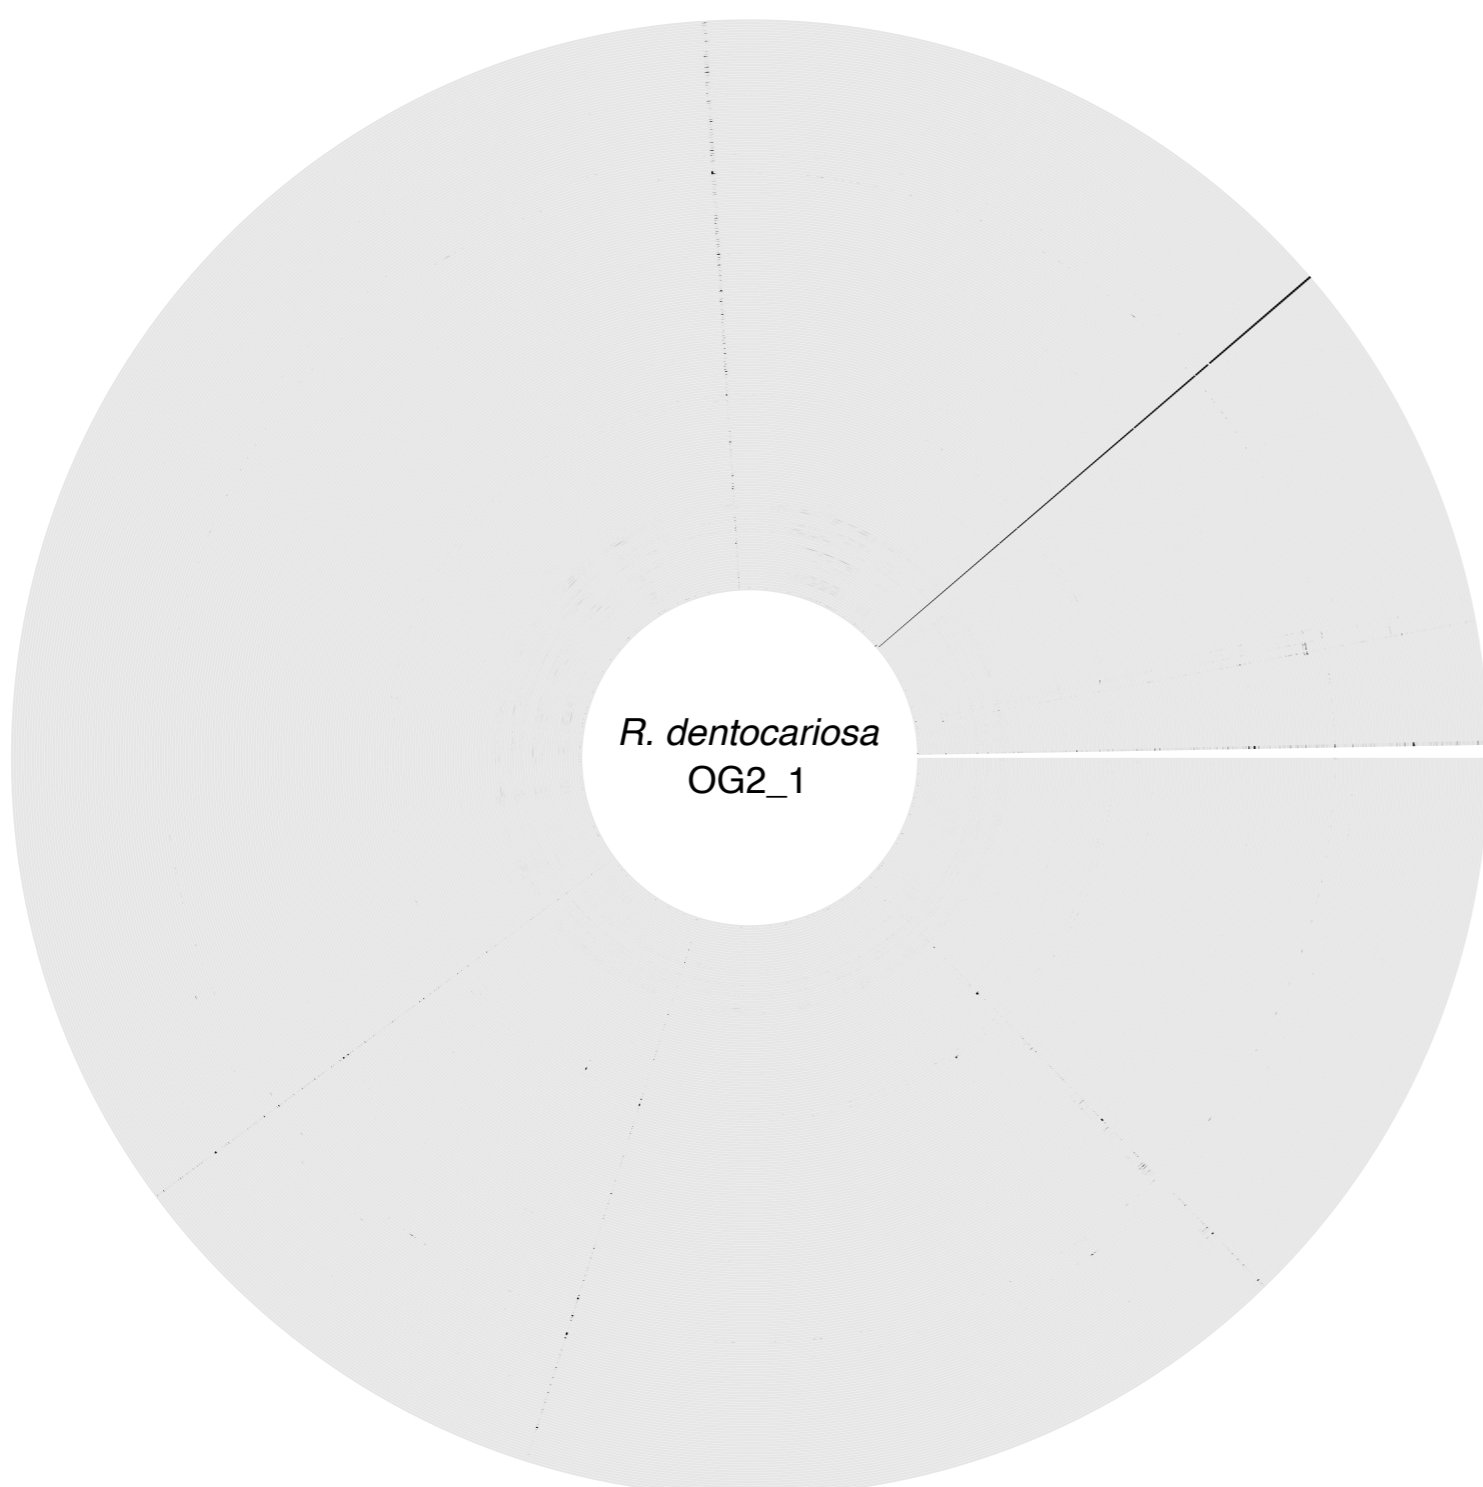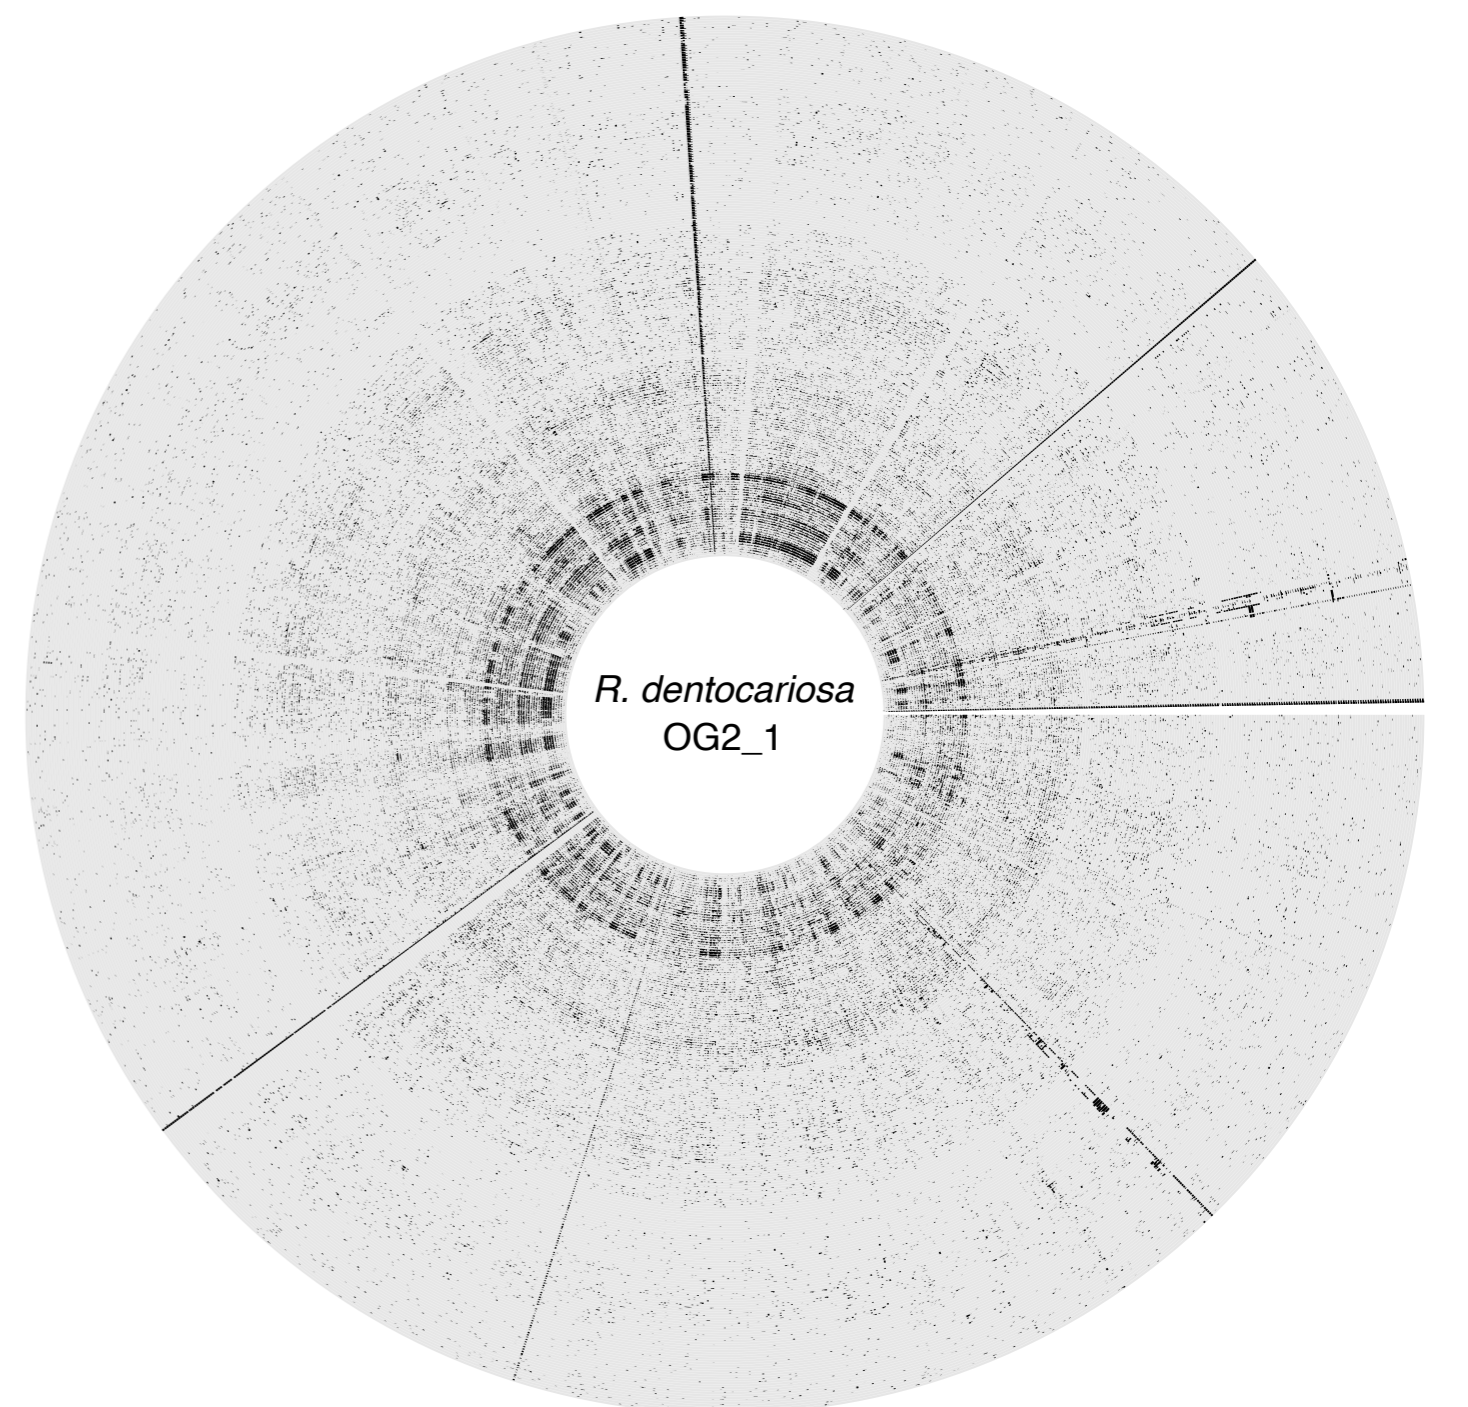

Supplement: Supplementary file [file media-8.pdf]
