# Supplementary material for: Metapangenomics of the oral microbiome provides insights into habitat adaptation and cultivar diversity
Source: bioRxiv or medRxiv preprint supplement (doi:10.1101/2020.05.01.072496), 2020-07-31

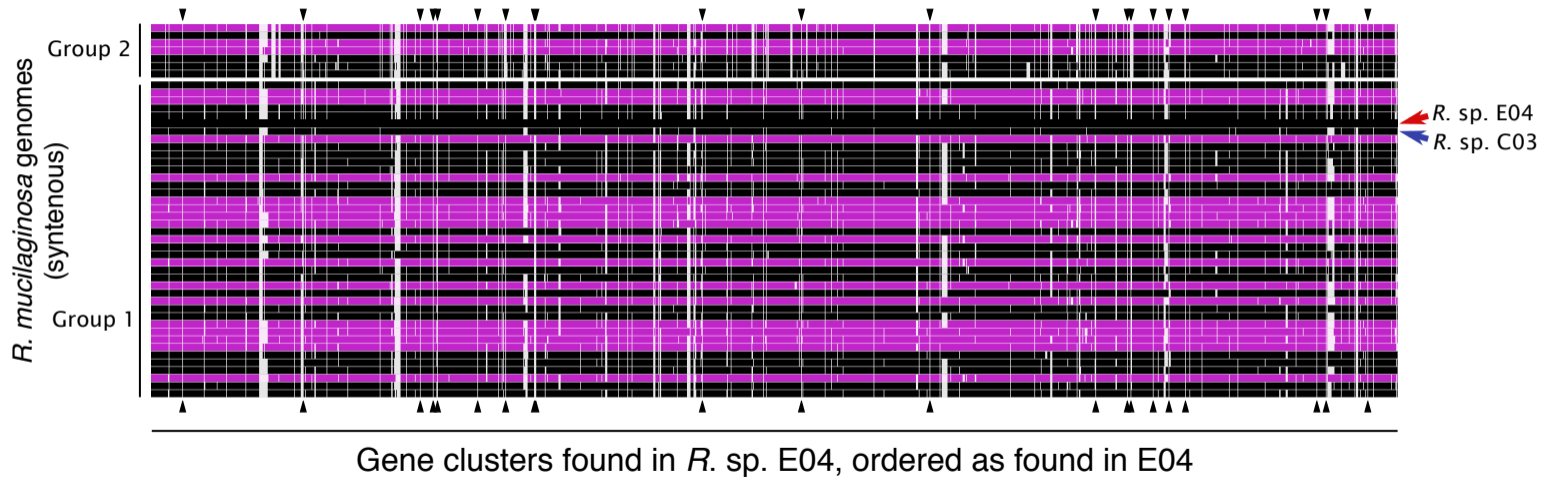

Supplement: Supplementary file [file media-9.pdf]
