# Supplementary material for: Metapangenomics of the oral microbiome provides insights into habitat adaptation and cultivar diversity
Source: bioRxiv or medRxiv preprint supplement (doi:10.1101/2020.05.01.072496), 2020-07-31
Supplement: Supplementary file [file media-10.pdf]

# Rothia\_sp\_HMSC069C03\_HMSC069C03

Items order: <> User order (D: none; L: none) | Current view: single | Samples order: custom

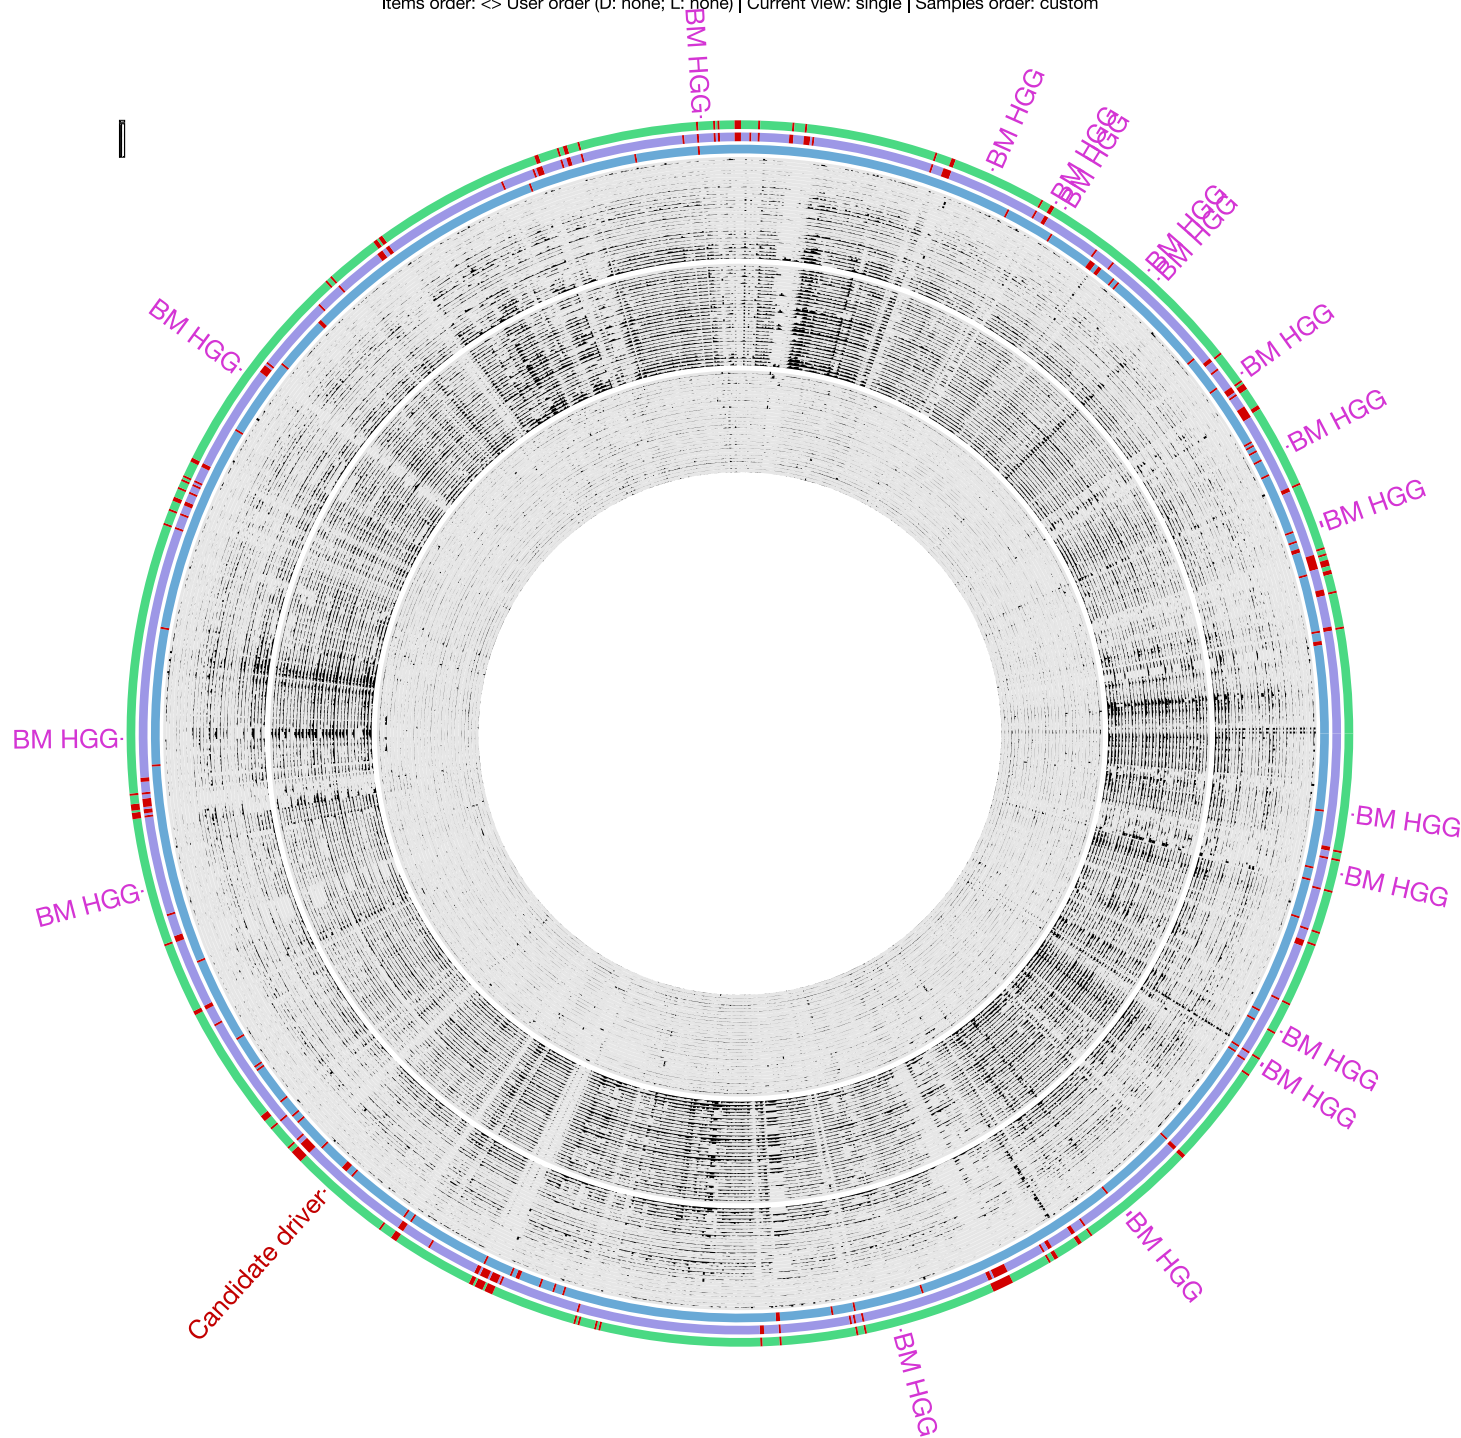

TD detection ■ DETECTED (1721) ■ NOT DETECTED (69)

BM detection ■ DETECTED (1633) ■ NOT DETECTED (157)

SUPP detection ■ DETECTED (1667) ■ NOT DETECTED (123)
